# Supplementary material for: Facile preparation of partially reduced graphite oxide nanosheets as a binder-free electrode for supercapacitors
Source: Royal Society of Chemistry journal article supplement (doi:10.1039/c8ra04788j), 2018-01-01
Supplement: c8ra04788j1.pdf [file c8ra04788j1.pdf]

Supporting information

Facile preparation of partial reduced graphite oxide nanosheets as binder-free  
electrode for supercapacitors

Juncai zhang<sup>1</sup>, Lingjuan Deng<sup>1\*</sup>, Zong-huai Liu<sup>2, 3</sup>

1 School of Chemistry & Chemical Engineering, Xianyang Normal University,  
Xianyang 712000, P. R. China

2 Key Laboratory of Applied Surface and Colloid Chemistry (Shaanxi Normal  
University), Ministry of Education, Xi'an 710062, P. R. China

3 School of Materials Science and Engineering, Shaanxi Normal University, Xi'an  
710062, P. R. China

\*Correspondence should be addressed to:

Lingjuan Deng

School of Chemistry & Chemical Engineering, Xianyang Normal University

Xianyang, Shaanxi, 712000, P. R. China

Tel: ++86-29-33720704

E-mail: [denglingjuan@163.com](mailto:denglingjuan@163.com)

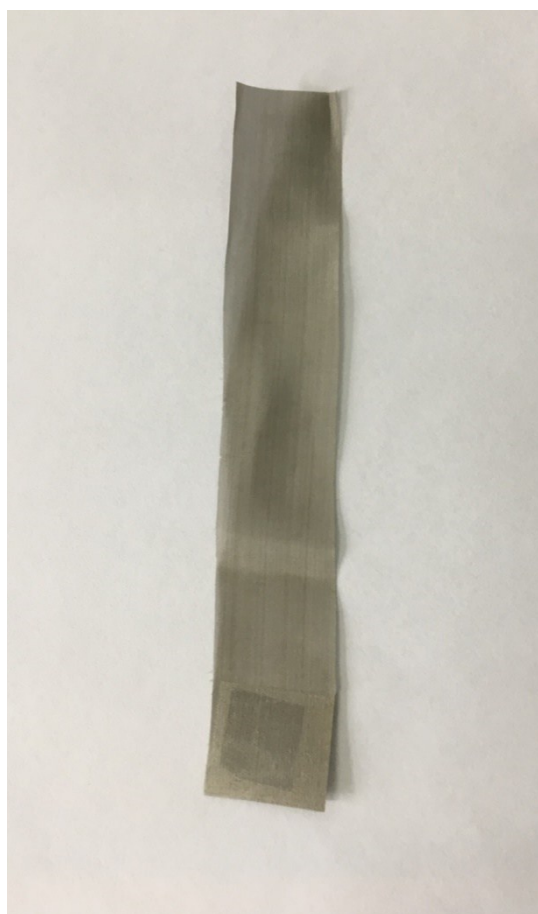

**Fig. s1** Photo image of prepared electrode tested in three-electrode system.

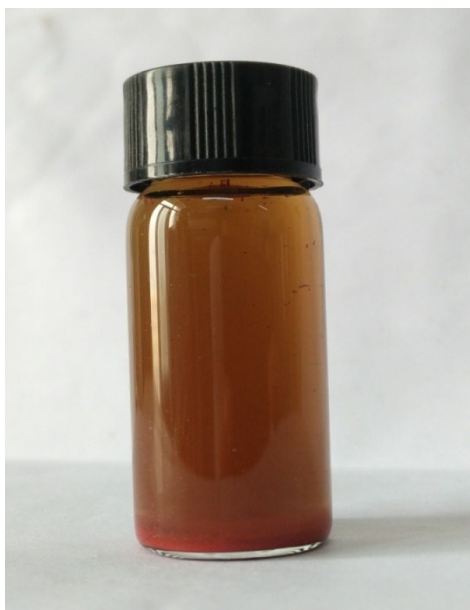

**Fig. s2** Photo image of GO dispersion after being added Cu<sub>2</sub>O and siring for 10 min.

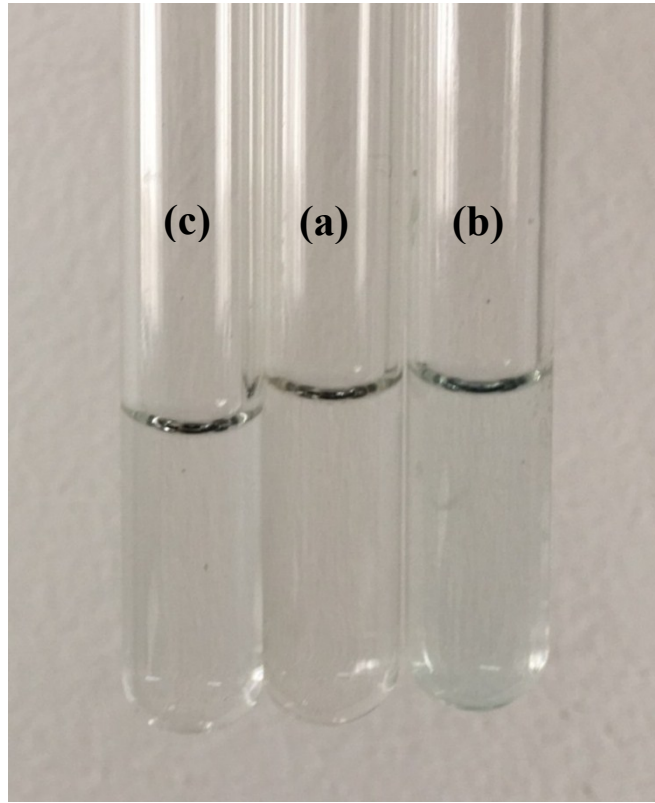

**Fig. s3** Experimental phenomena of adding NaOH solution to (a) H<sub>2</sub>O, (b) supernatant of Cu<sub>2</sub>O powder in H<sub>2</sub>O and (c) GO mixed with Cu<sub>2</sub>O powder (0.75 g) for 1h.
